# Supplementary material
Source: Springer Nature journal article supplement (https://www.springermedizin.de/resource/supplementary/13023_2013_743_MOESM3_ESM.pdf/9642982)

● V30M with

○ V30M without

● Non-V30M with

○ Non-V30M without

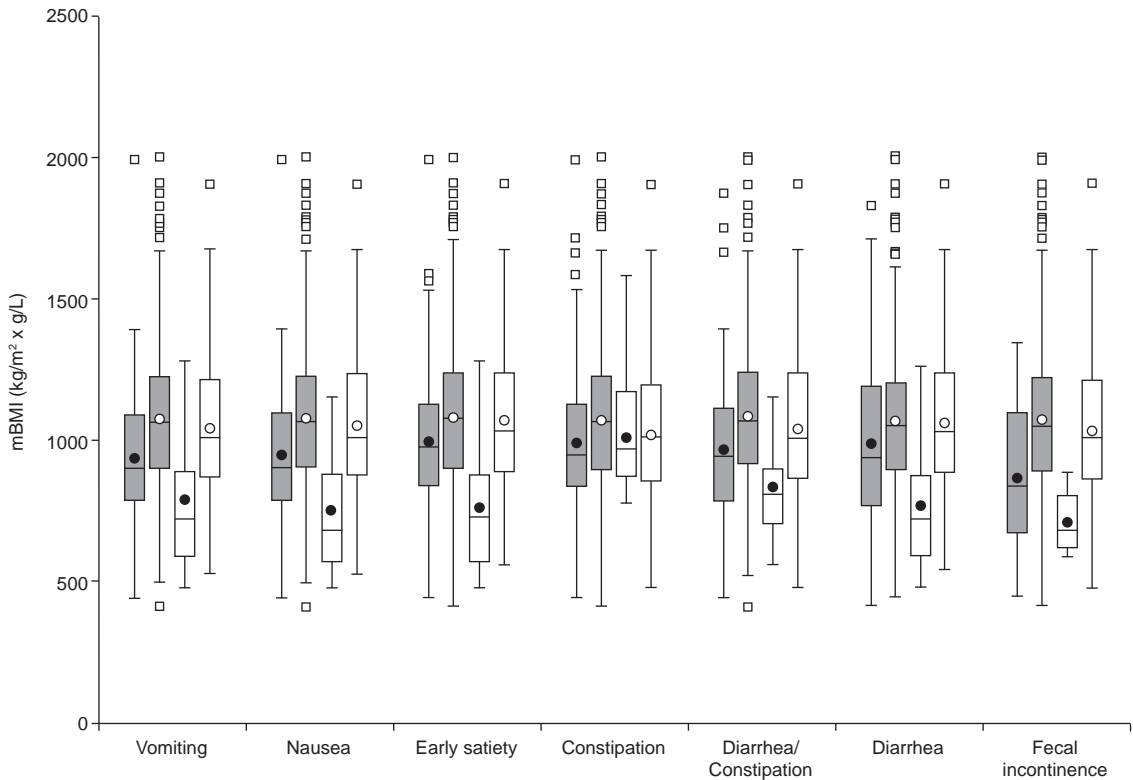

Supplement: MOESM3 [file 9642982]
